# Supplementary material
Source: ML conference proceedings conference paper supplement (https://proceedings.neurips.cc/paper_files/paper/2019/hash/68053af2923e00204c3ca7c6a3150cf7-Abstract.html)
Supplement: Supplementary file [file 68053af2923e00204c3ca7c6a3150cf7-Supplemental.zip]

---

# Supplementary materials for: Deliberative Explanations: visualizing network insecurities

---

Pei Wang and Nuno Vasconcelos  
Department of Electrical and Computer Engineering  
University of California, San Diego  
{pew062, nvasconcelos}@ucsd.edu

## Appendix 1: Attribution Maps

An attribution map can be created by performing a first-order Taylor series expansion of the mapping  $g_p$  at each location  $(i, j)$ . Performing the Taylor expansion in the neighborhood of a reference tensor of feature responses  $\mathbf{A}^0 \in \mathbb{R}^{W \times H \times D}$  leads to

$$m_{i,j}^p = g_p(\mathbf{A}^0) + [\nabla g_p(\mathbf{A}^0)]_{i,j}^T [\mathbf{a}_{i,j} - \mathbf{a}_{i,j}^0] + \mathcal{O}^n \quad (1)$$

Several attribution approaches in the literature [8, 3, 5, 2, 4, 6] can be seen as implementing a map of this form, under the assumptions that  $\mathbf{A}^0 = \mathbf{0}$  and  $g_p$  is a linear mapping that passes through the origin, i.e.  $g_p(\mathbf{0}) = \mathbf{0}$  and  $\nabla g_p(\mathbf{A}) = \nabla g_p(\mathbf{A}^0)$ . In this case,

$$m_{i,j}^p = [\nabla g_p(\mathbf{A})]_{i,j}^T \mathbf{a}_{i,j}. \quad (2)$$

Different approaches use maps of this type, focusing on alternative ways to compute the gradient [1], e.g. using maps of the form

$$m_{i,j}^p = \langle \nabla g_p(\mathbf{A}) \rangle^T \mathbf{a}_{i,j}. \quad (3)$$

where  $\langle \nabla g_p(\mathbf{A}) \rangle$  is some gradient average [3, 6]. Rather than this, we consider the second-order Taylor series expansion of  $g_p$

$$m_{i,j}^p = g_p(\mathbf{A}^0) + [\nabla g_p(\mathbf{A}^0)]_{i,j}^T [\mathbf{a}_{i,j} - \mathbf{a}_{i,j}^0] + \frac{1}{2} [\mathbf{a}_{i,j} - \mathbf{a}_{i,j}^0]^T [\mathbf{H}(\mathbf{A}^0)]_{i,j} [\mathbf{a}_{i,j} - \mathbf{a}_{i,j}^0] + \mathcal{O}^n \quad (4)$$

where  $\mathbf{H}(\mathbf{A}^0) = \nabla^2 g_p(\mathbf{A}^0)$  is the Hessian matrix of  $g_p$  at  $\mathbf{A}^0$ . We then make similar assumptions, namely that  $\mathbf{A}^0 = \mathbf{0}$  and  $g_p(\mathbf{0}) = \mathbf{0}$ . However, rather than assuming that  $g_p$  is linear, we assume that it is a second order function and that  $\mathbf{A} \approx \mathbf{0}$ , from which it follows that  $\nabla g_p(\mathbf{A}^0) \approx \nabla g_p(\mathbf{A})$  and  $\mathbf{H}(\mathbf{A}^0) \approx \mathbf{H}(\mathbf{A})$ . This leads to

$$m_{i,j}^p = [\nabla g_p(\mathbf{A})]_{i,j}^T \mathbf{a}_{i,j} + \frac{1}{2} \mathbf{a}_{i,j}^T [\mathbf{H}(\mathbf{A})]_{i,j} \mathbf{a}_{i,j}. \quad (5)$$

While the use of gradient and Hessian averages, as in (3), could also be used, we have not yet considered such variants.

## Appendix 2: Attribute Assignment

The parts and attributes of the CUB200 dataset [7] are listed in Table 1.

## Appendix 3: More Success Cases

More success case images are shown in Figure 1 for ADE20K and 2 for CUB200.

| Parts           | Attributes                                                   |
|-----------------|--------------------------------------------------------------|
| back            | back color, back pattern                                     |
| beak            | bill shape, bill length, bill color                          |
| belly           | belly color, belly pattern                                   |
| breast          | breast color, breast pattern                                 |
| crown           | crown color, forehead color, head pattern                    |
| forehead        | forehead color, head pattern                                 |
| left/right eye  | eye color, head pattern                                      |
| left/right leg  | leg color                                                    |
| left/right wing | wing color, wing shape, wing pattern                         |
| nape            | nape color                                                   |
| tail            | tail shape, upper tail color, under tail color, tail pattern |
| throat          | throat color, head pattern                                   |

Table 1: Attributes assignments on CUB200 [7]

## References

- [1] Marco Ancona, Enea Ceolini, Cengiz Öztireli, and Markus Gross. A unified view of gradient-based attribution methods for deep neural networks. In *NIPS 2017-Workshop on Interpreting, Explaining and Visualizing Deep Learning*. ETH Zurich, 2017.
- [2] Sebastian Bach, Alexander Binder, Grégoire Montavon, Frederick Klauschen, Klaus-Robert Müller, and Wojciech Samek. On pixel-wise explanations for non-linear classifier decisions by layer-wise relevance propagation. *PloS one*, 10(7):e0130140, 2015.
- [3] Ramprasaath R Selvaraju, Michael Cogswell, Abhishek Das, Ramakrishna Vedantam, Devi Parikh, and Dhruv Batra. Grad-cam: Visual explanations from deep networks via gradient-based localization. In *Proceedings of the IEEE International Conference on Computer Vision*, pages 618–626, 2017.
- [4] Avanti Shrikumar, Peyton Greenside, and Anshul Kundaje. Learning important features through propagating activation differences. In *Proceedings of the 34th International Conference on Machine Learning-Volume 70*, pages 3145–3153. JMLR. org, 2017.
- [5] Karen Simonyan, Andrea Vedaldi, and Andrew Zisserman. Deep inside convolutional networks: Visualising image classification models and saliency maps. *arXiv preprint arXiv:1312.6034*, 2013.
- [6] Mukund Sundararajan, Ankur Taly, and Qiqi Yan. Axiomatic attribution for deep networks. In *Proceedings of the 34th International Conference on Machine Learning-Volume 70*, pages 3319–3328. JMLR. org, 2017.
- [7] P. Welinder, S. Branson, T. Mita, C. Wah, F. Schroff, S. Belongie, and P. Perona. Caltech-UCSD Birds 200. Technical Report CNS-TR-2010-001, California Institute of Technology, 2010.
- [8] Bolei Zhou, Aditya Khosla, Agata Lapedriza, Aude Oliva, and Antonio Torralba. Learning deep features for discriminative localization. In *Proceedings of the IEEE conference on computer vision and pattern recognition*, pages 2921–2929, 2016.
- [9] Bolei Zhou, Hang Zhao, Xavier Puig, Sanja Fidler, Adela Barriuso, and Antonio Torralba. Scene parsing through ade20k dataset. In *Proceedings of the IEEE Conference on Computer Vision and Pattern Recognition*, 2017.

| Insecurity                                                                                                           |                                                                                                                               | Ambiguity                                                                                                          |                                                                            |  |
|----------------------------------------------------------------------------------------------------------------------|-------------------------------------------------------------------------------------------------------------------------------|--------------------------------------------------------------------------------------------------------------------|----------------------------------------------------------------------------|--|
| <b>Class: Nunnery</b><br>           | <b>Class: Nunnery</b><br>                    | <b>Class: Fortress</b><br>       | <b>Shared Part:</b><br>Building<br>Edifice<br>Grass                        |  |
| <b>Class: Abbey</b><br>             | <b>Class: Mental institution outdoor</b><br> | <b>Class: Guardroom</b><br>      | <b>Shared Part:</b><br>Sky<br>Window                                       |  |
| <b>Class: Mountain</b><br>         | <b>Class: Moor</b><br>                      | <b>Class: Heath</b><br>         | <b>Shared Part:</b><br>Person                                              |  |
| <b>Class: Bathhouse</b><br>       | <b>Class: Inn outdoor</b><br>              | <b>Class: House</b><br>        | <b>Shared Part:</b><br>Sky<br>Grass<br>Plant<br>Building                   |  |
| <b>Class: Questionable</b><br>    | <b>Class: Inn indoor</b><br>               | <b>Class: Living room</b><br>  | <b>Shared Part:</b><br>Wall<br>Floor<br>Celling<br>Window<br>Chair<br>Lamp |  |
| <b>Class: Theater outdoor</b><br> | <b>Class: Entrance</b><br>                 | <b>Class: Bank outdoor</b><br> | <b>Shared Part:</b><br>Building<br>Road<br>Sidewalk                        |  |

Figure 1: Success case of deliberative visualizations for images from ADE20K [9].

| Insecurity                                                                                                        | Ambiguity                                                                                                          |                                                                                                                       |                                                                                                                                                           |
|-------------------------------------------------------------------------------------------------------------------|--------------------------------------------------------------------------------------------------------------------|-----------------------------------------------------------------------------------------------------------------------|-----------------------------------------------------------------------------------------------------------------------------------------------------------|
| <b>Class: American crow</b><br>  | <b>Class: Common raven</b><br>    | <b>Class: American crow</b><br>     | <b>Shared Part:</b> <ul style="list-style-type: none"> <li>Leg color is black;</li> </ul>                                                                 |
| <b>Class: Shiny cowbird</b><br>  | <b>Class: Shiny cowbird</b><br>   | <b>Class: Fish crow</b><br>         | <b>Shared Part:</b> <ul style="list-style-type: none"> <li>Bill shape is all purpose;</li> <li>Bill length is shorter than head;</li> <li>...</li> </ul>  |
| <b>Class: Herring gull</b><br>  | <b>Class: Western gull</b><br>   | <b>Class: Glaucous gull</b><br>    | <b>Shared Part:</b> <ul style="list-style-type: none"> <li>Bill shape is hooked;</li> <li>Bill length is the same as head;</li> <li>...</li> </ul>        |
| <b>Class: Herring gull</b><br> | <b>Class: Glaucous gull</b><br> | <b>Class: California gull</b><br> | <b>Shared Part:</b> <ul style="list-style-type: none"> <li>Belly color is white;</li> <li>Belly pattern is solid;</li> <li>...</li> </ul>                 |
| <b>Class: Caspian tern</b><br> | <b>Class: Common tern</b><br>   | <b>Class: Caspian tern</b><br>    | <b>Shared Part:</b> <ul style="list-style-type: none"> <li>Wing color is white;</li> <li>Wing shape is long;</li> <li>Wing pattern is solid;</li> </ul>   |
| <b>Class: Caspian tern</b><br> | <b>Class: Caspian tern</b><br>  | <b>Class: Elegant tern</b><br>    | <b>Shared Part:</b> <ul style="list-style-type: none"> <li>Tail shape is forked;</li> <li>Tail color is white;</li> <li>Tail pattern is solid;</li> </ul> |

Figure 2: Success case of deliberative visualizations for images from CUB200 [7].
